# Supplementary material for: Molecular characterization and prognostic relevance of m6A regulators in pancreatic adenocarcinoma
Source: Research Square preprint supplement (doi:10.21203/rs.3.rs-4948418/v1), 2024-10-16
Supplement: Supplementary file 1 [file 07ea726183e5a8802df9a551.xlsx]

## Sheet: Sheet1
Table S1: The basic information of the included m6A regulators.
Gene name	Full name	Gene ID	Type
EIF3A	eukaryotic translation initiation factor 3 subunit A	8661	readers
ELAVL1	ELAV like RNA binding protein 1	1994	readers
FMR1	fragile X mental retardation 1	2332	readers
HNRNPA2B1	heterogeneous nuclear ribonucleoprotein A2/B1	3181	readers
HNRNPC	heterogeneous nuclear ribonucleoprotein C (C1/C2)	3183	readers
IGF2BP1	insulin like growth factor 2 mRNA binding protein 1	10642	readers
IGF2BP2	insulin like growth factor 2 mRNA binding protein 2	10644	readers
IGF2BP3	insulin like growth factor 2 mRNA binding protein 3	10643	readers
LRPPRC	leucine rich pentatricopeptide repeat containing	10128	readers
RBMX	RNA binding motif protein X-linked	27316	readers
YTHDC1	YTH domain containing 1	91746	readers
YTHDC2	YTH domain containing 2	64848	readers
YTHDF1	YTH N6-methyladenosine RNA binding protein 1	54915	readers
YTHDF2	YTH N6-methyladenosine RNA binding protein 2	51441	readers
YTHDF3	YTH N6-methyladenosine RNA binding protein 3	253943	readers
CBLL1	Cbl proto-oncogene like 1	79872	writers
METTL14	methyltransferase like 14	57721	writers
METTL3	methyltransferase like 3	56339	writers
RBM15	RNA binding motif protein 15	64783	writers
RBM15B	RNA binding motif protein 15B	29890	writers
VIRMA/KIAA1429	vir like m6A methyltransferase associated	25962	writers
WTAP	WT1 associated protein	9589	writers
ZC3H13	zinc finger CCCH-type containing 13	23091	writers
ALKBH5	alkB homolog 5, RNA demethylase	54890	erasers
FTO	FTO alpha-ketoglutarate dependent dioxygenase	79068	erasers
